# Supplementary material
Source: PubMed Central journal article supplement (PMC2971590)
Supplement: pp.110.162396_1.pdf [file pp.110.162396_1.pdf]

Supplementary Figures, Table, and Legends

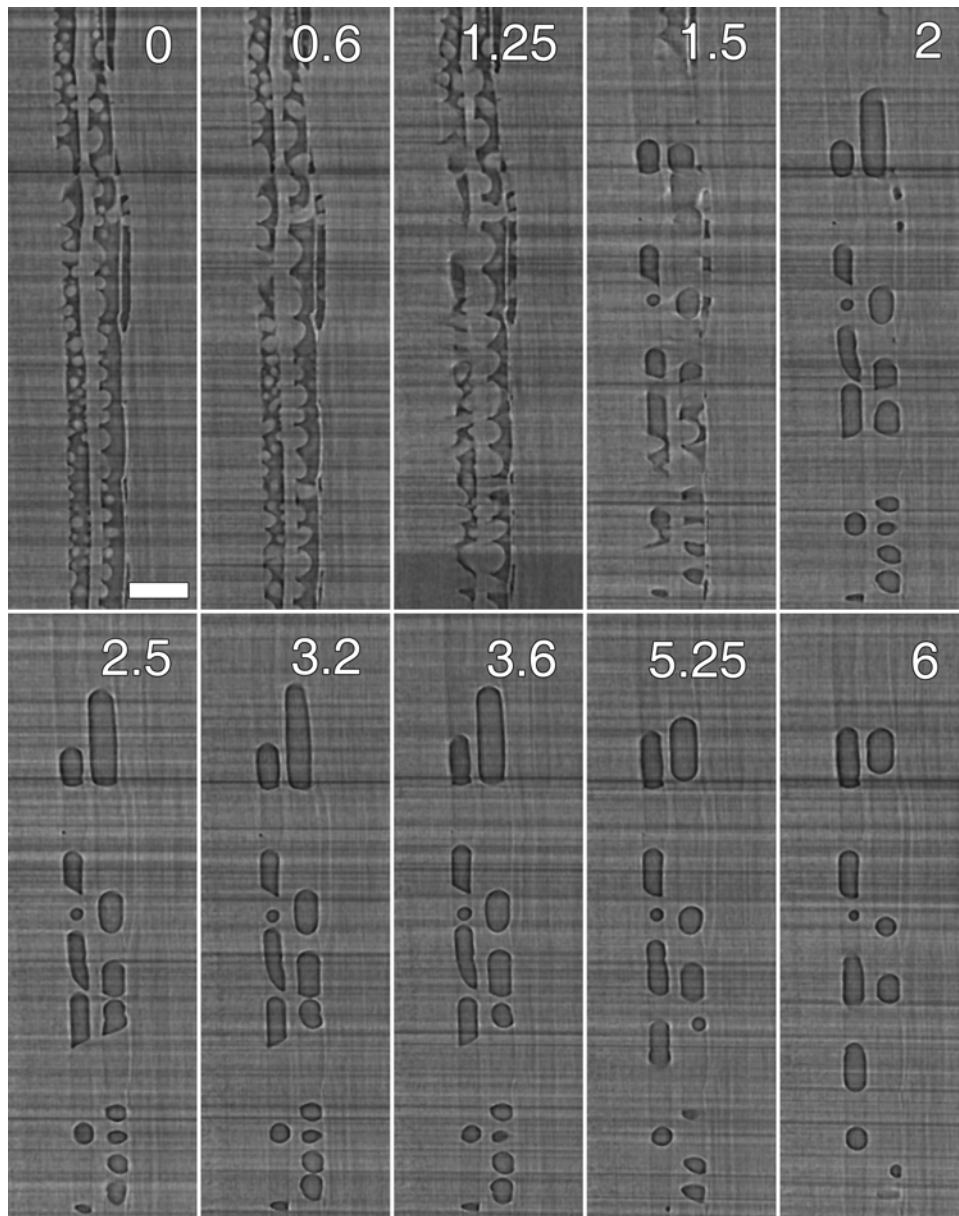

**Figure S1.** Longitudinal HRCT refilling time series showing the compression and dissolution of gas bubbles in the xylem. Over time, droplets grow and coalesce inside vessels. Trapped gas bubbles eventually collapse. Time in hours. Bar = 200  $\mu\text{m}$ .

## In Vivo Dynamics of Embolism Repair – Supplemental Data

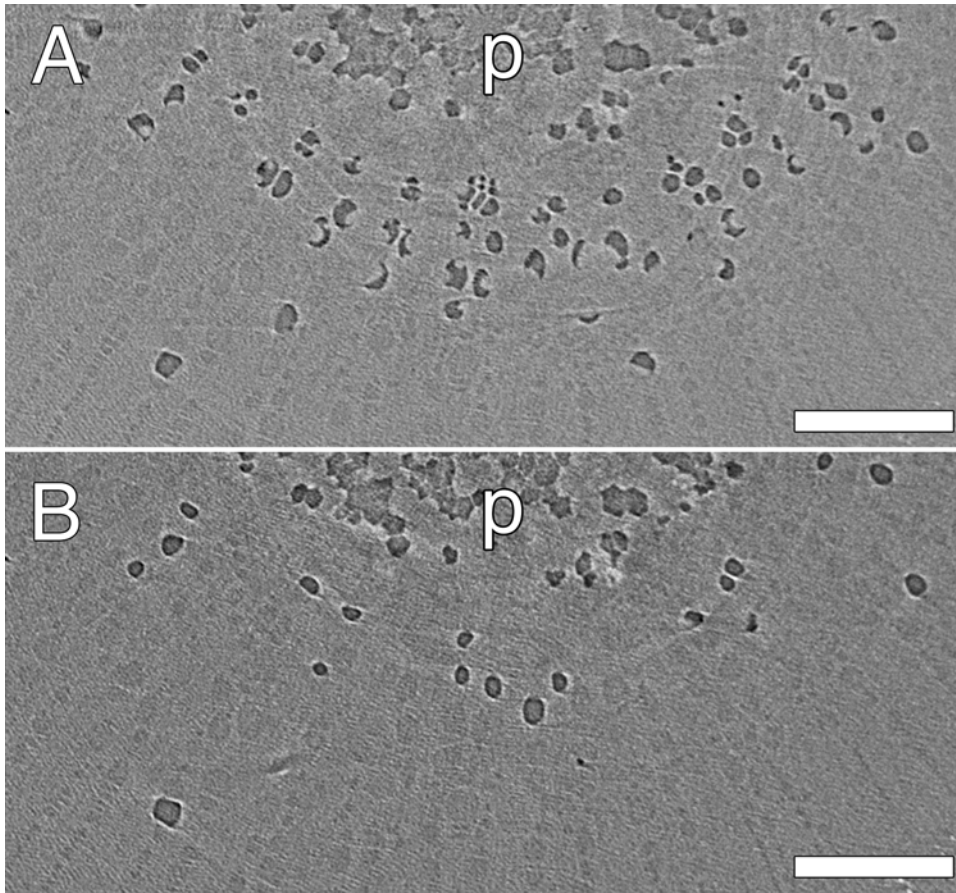

**Figure S2.** In vivo refilling of grapevine vessels. Transverse HRCT sections early (A) and late (B) in the refilling process. Droplets are visible inside the vessels (A), and refilling is actively occurring in small diameter vessels near the central pith (p). After six hours (B), the majority of the vessels have filled. Bars = 500  $\mu$ m.

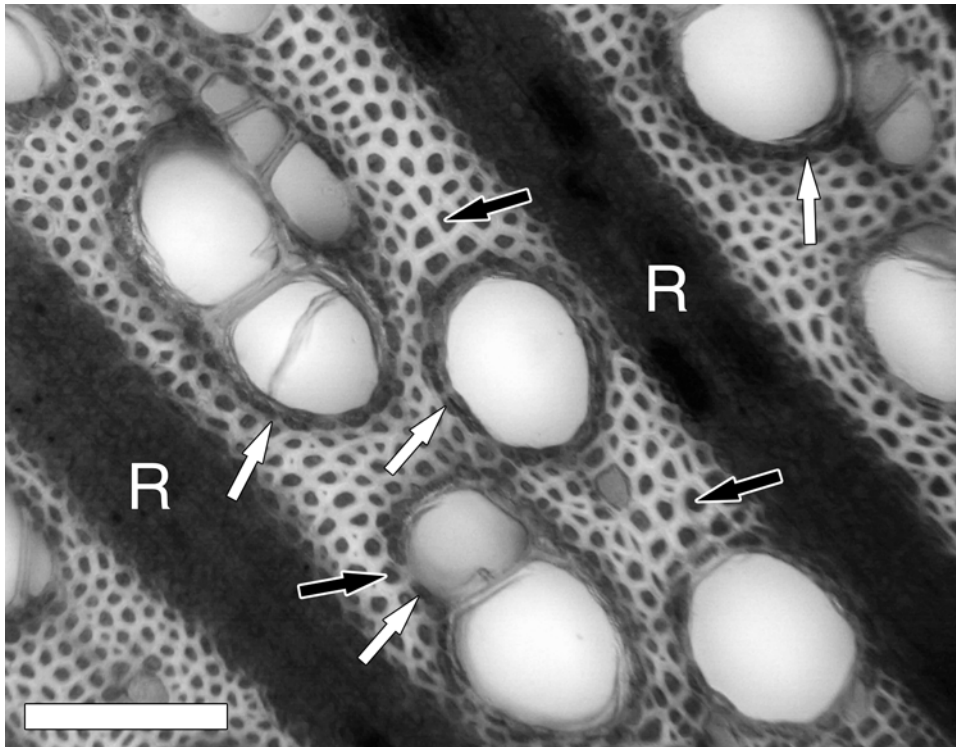

**Figure S3.** Distribution of cell types surrounding xylem vessels in grapevine. Fibers (black arrows), xylem parenchyma (white arrows), and rays (R) surround the vessels. Bar = 125  $\mu\text{m}$ .

**In Vivo Dynamics of Embolism Repair – Supplemental Data**

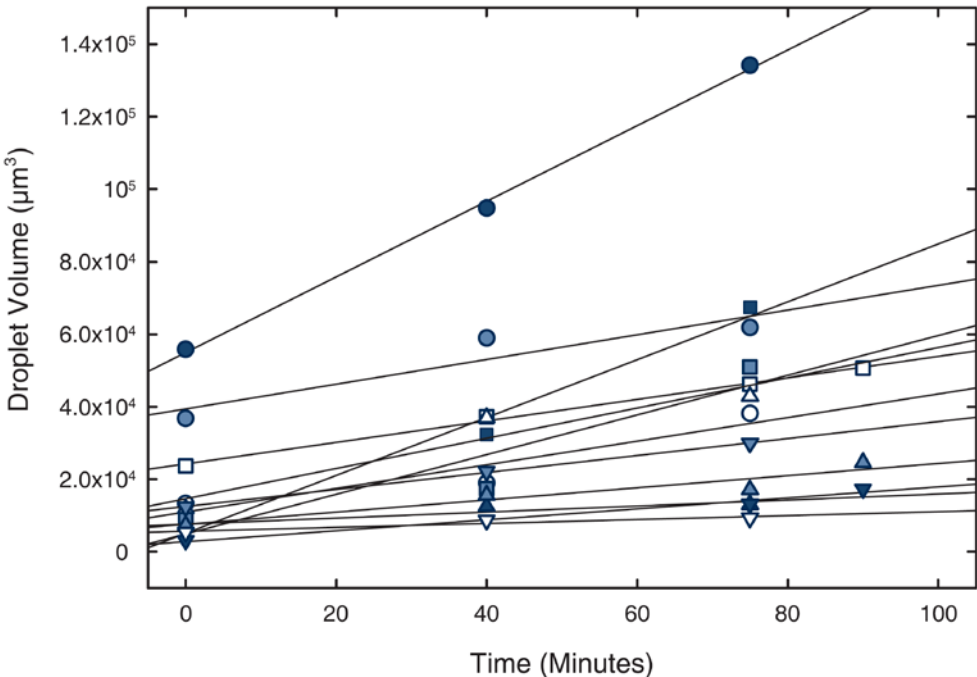

**Figure S4.** Volume change of 12 individual droplets visualized with time-lapse HRCT scans. Lines are linear regressions for the relation of volume to time ( $R^2 = 0.84 - 1.00$ , mean = 0.92).

## In Vivo Dynamics of Embolism Repair – Supplemental Data

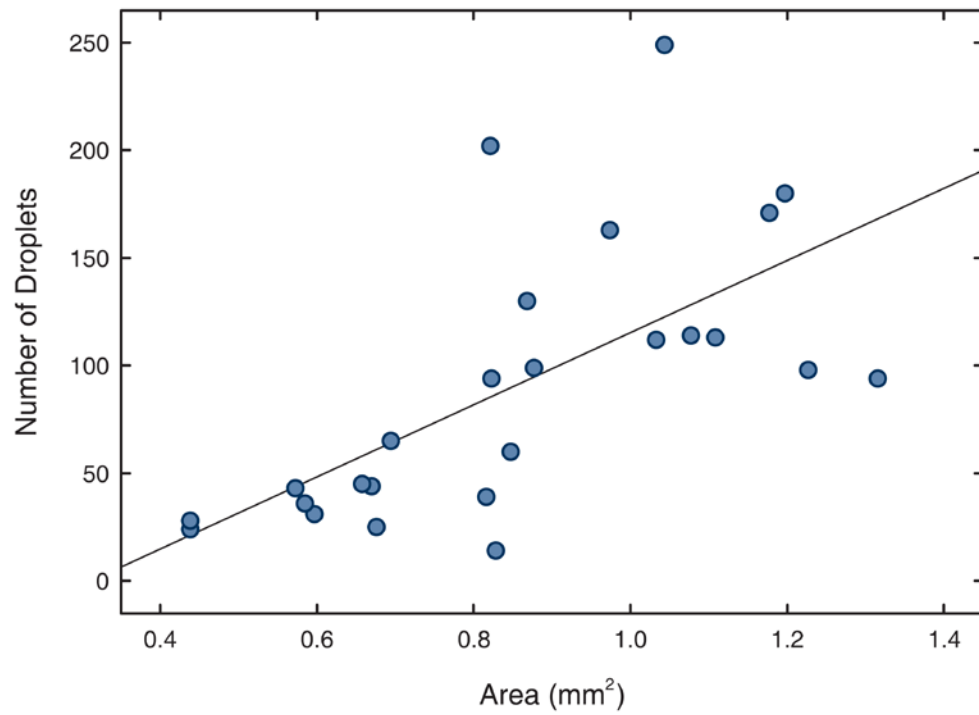

**Figure S5.** Relationship between the total number of drops in a vessel and the internal surface area. A linear regression is fitted to all data (25 vessels from all three experimental plants).  $R^2 = 0.42$ .

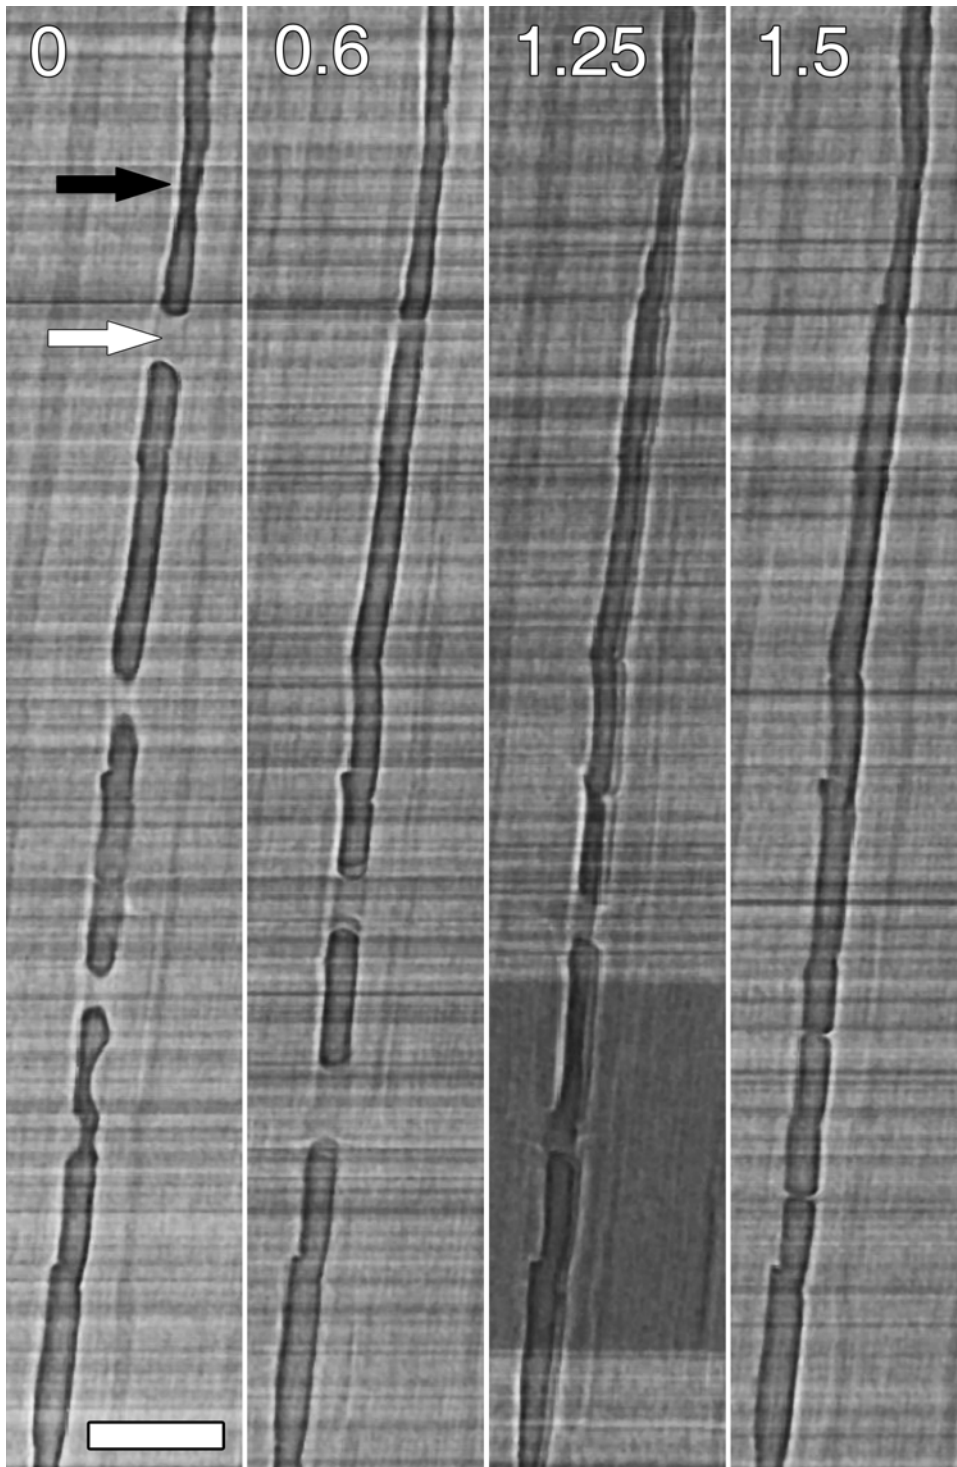

**Figure S6.** Longitudinal HRCT time series showing refilling failure. Water droplets (white arrow) span the vessel lumen (black arrow) early, but are eventually pulled into a neighbouring filled vessel under tension. Time in hours. Bar = 350  $\mu$ m.

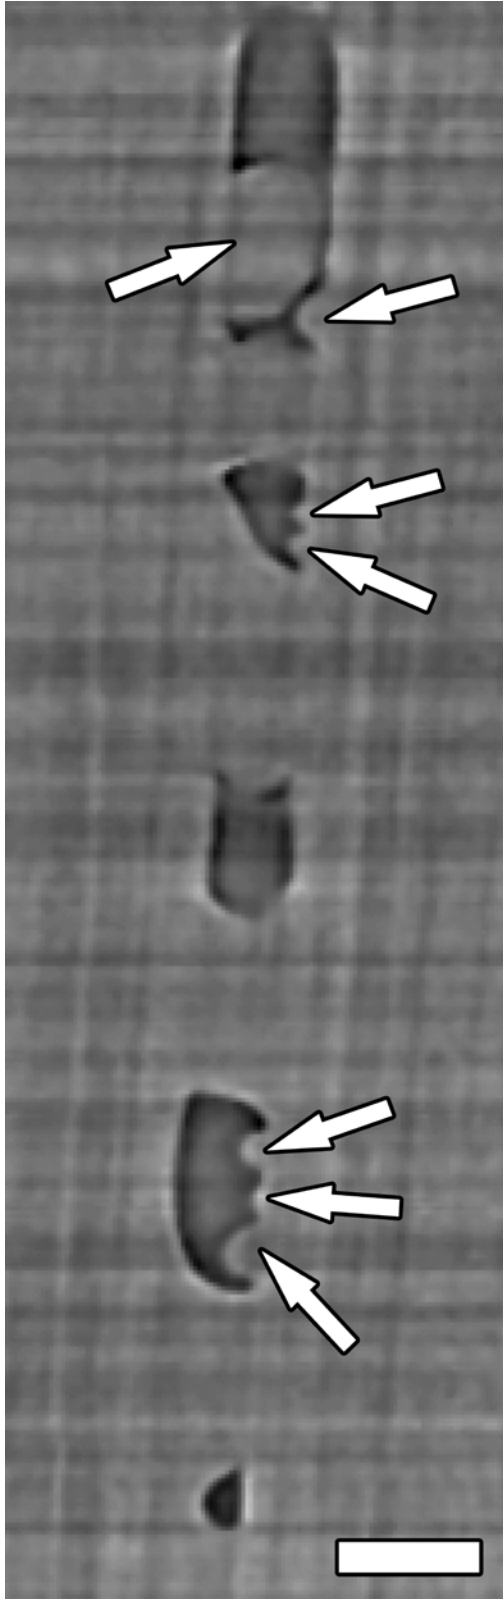

**Figure S7.** Magnified HRCT scan from Fig. 4A. This image shows droplets (arrows) forming inside of a vessel that eventually fails to refill. Bar = 125  $\mu\text{m}$ .

## In Vivo Dynamics of Embolism Repair – Supplemental Data

**Table S1. ANOVA data describing the observed and predicted results from droplet growth and refilling analysis.**

| Source          | DF | Sum of Squares | Mean Square | F Value | Pr > F |
|-----------------|----|----------------|-------------|---------|--------|
| Model           | 39 | 93322122602    | 2392874939  | 107.29  | <.0001 |
| Error           | 15 | 334554408      | 22303627    |         |        |
| Corrected Total | 54 | 93656677010    |             |         |        |

  

|  | R <sup>2</sup> | Coeff Var | Type III SS | Volume Mean |
|--|----------------|-----------|-------------|-------------|
|  | 0.996          | 13.55     | 4722.67     | 34848.53    |

  

| Source                    | DF | Sum of Squares | Mean Square | F Value | Pr > F |
|---------------------------|----|----------------|-------------|---------|--------|
| Vessel                    | 6  | 9522721092     | 1587120182  | 71.16   | <.0001 |
| Drop within vessel        | 13 | 7419370784     | 570720830   | 25.59   | <.0001 |
| Time                      | 1  | 7591984272     | 7591984272  | 340.39  | <.0001 |
| Time * Drop within vessel | 19 | 10736616211    | 565085064   | 25.34   | <.0001 |

The significance of the Time\*Drop within vessel indicates that different drops grow at different rates.

### Supplemental Video Legend

**Video S1.** 3-D reconstruction of refilling vessels in grapevine. Here, a section of stem is displayed by panning through the stack of virtual transverse HRCT sections. Four vessel walls (green) and the droplets within (blue) are revealed. The vessel walls are removed to visualize the droplets. Scale changes with orientation.
